# Supplementary material
Source: PubMed Central journal article supplement (PMC5134986)
Supplement: supp_tpc.16.00562_TPC2016-00562-LSBR1_Supplemental_Data_pdf.pdf [file supp_tpc.16.00562_TPC2016-00562-LSBR1_Supplemental_Data_pdf.pdf]

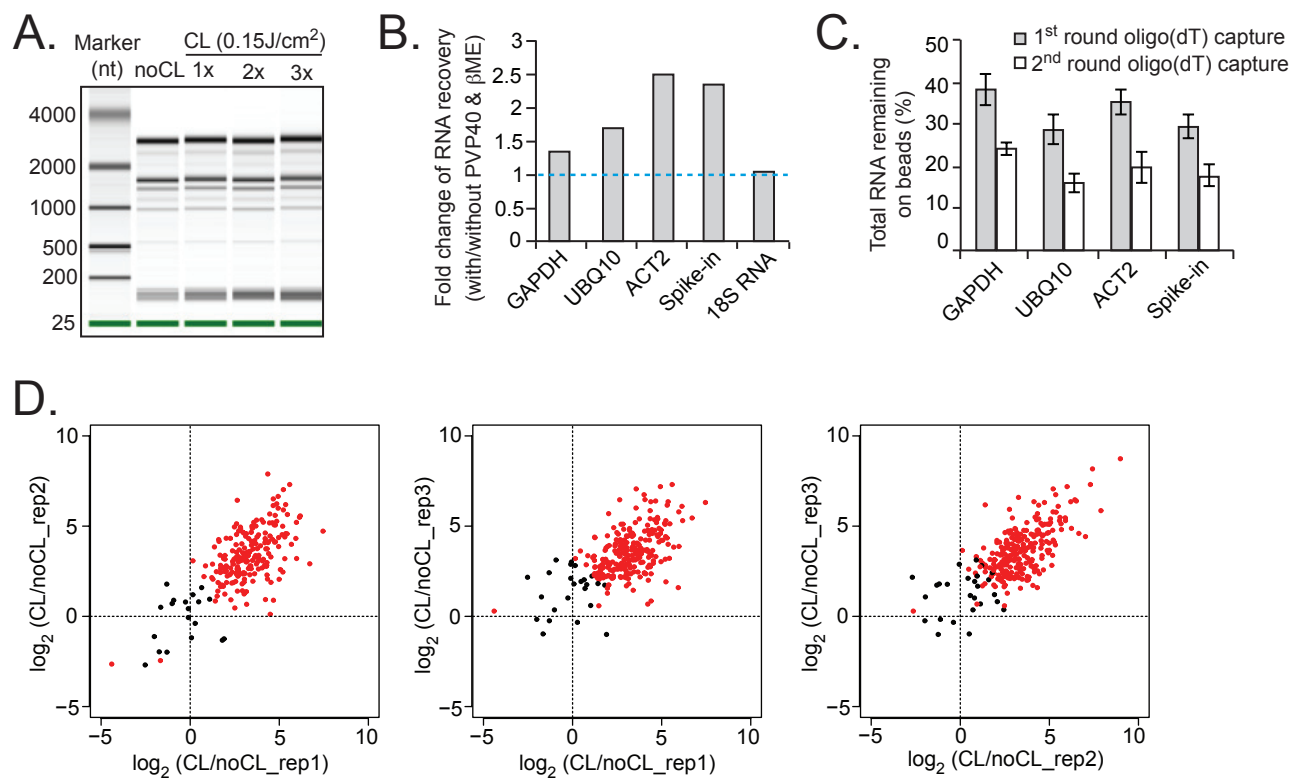

Supplemental Figure 1. Optimization of the Arabidopsis mRNA interactome capture protocol.

(A). RNA extracted from four-day-old etiolated seedlings was cross-linked (CL) either once, twice or three times at UV 150 mJ/cm<sup>2</sup>.

Non-cross-linked (noCL) seedlings were used as control. RNA integrity was analysed on a Bioanalyzer 2100 using an RNA pico chip, and is depicted as the gel representation of in-chip electrophoresis.

(B). Lysates were prepared from noCL four-day-old etiolated seedlings using a lysis buffer with or without polyvinylpyrrolidone 40 (PVP40) and  $\beta$ -mercaptoethanol ( $\beta$ -ME). RNA captured on oligo(dT) beads was extracted and used for qRT-PCR. Measurements are the average of three technical replicates and are shown as fold change in RNA recovery upon addition of PVP40 and  $\beta$ -ME to lysis buffer.

(C). Two rounds of oligo(dT) capture were performed using a lysate from noCL four-day-old etiolated seedlings. Aliquots of the lysate were taken after the first and second round of oligo(dT) capture, respectively, followed by RNA extraction and qRT-PCR analysis. Measurements are the average of three technical replicates with error bars representing the SD. Measurements are shown relative to the input.

(D). Scatter plots comparing the protein enrichment in CL over noCL based on LC-MS/MS intensities of two biological replicates. Proteins significantly enriched (FDR < 1%) in CL or noCL are depicted in red. Proteins that lack enrichment are depicted in black.

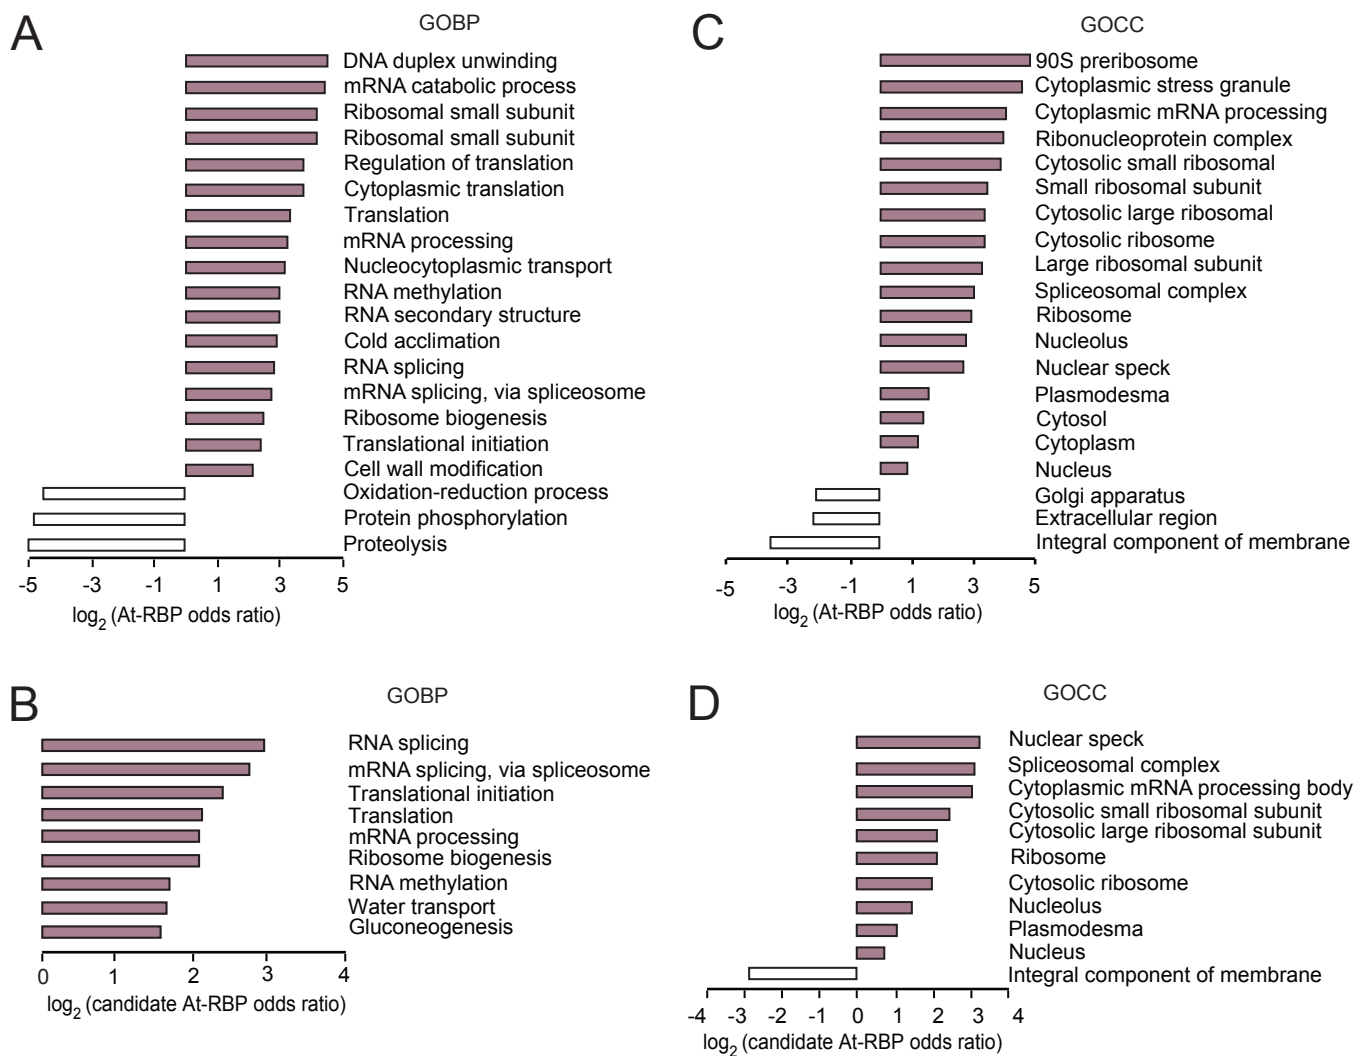

Supplemental Figure 2. GO enrichment analysis of At-RBPs and candidate At-RBPs. (A-B). The most significantly over- and under- represented Gene Ontology (GO) terms for biological process in At-RBPs (A) and candidate At-RBPs (B). (C-D). The most significantly over- and underrepresented GO terms for cellular compartment in At-RBPs (C) and candidate At-RBPs (D).

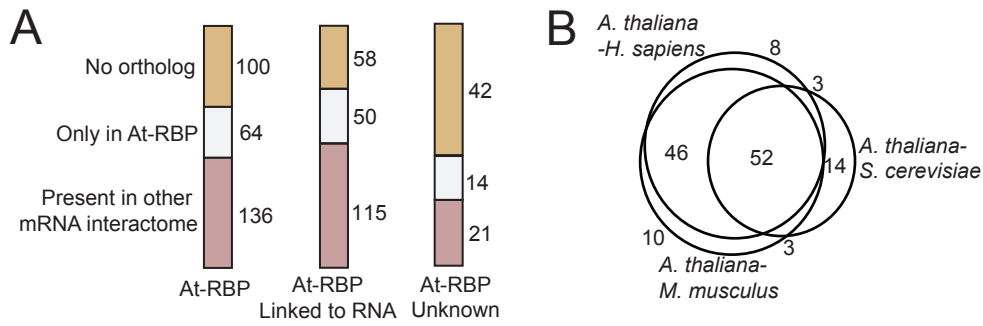

Supplemental Figure 3. Conservation of RBPs across kingdoms.

(A). Categorization of At-RBPs based on conservation between Arabidopsis, yeast, mouse, and human.

(B). Overlap of At-RBPs with proteins identified in mRNA interactomes of yeast (Beckmann et al. 2015), mouse (mESC (Kwon et al., 2013, HL-1 (Liao et al. 2016)) and human (HEK293 (Baltz et al., 2012), HuH7 (Beckmann et al. 2015))).

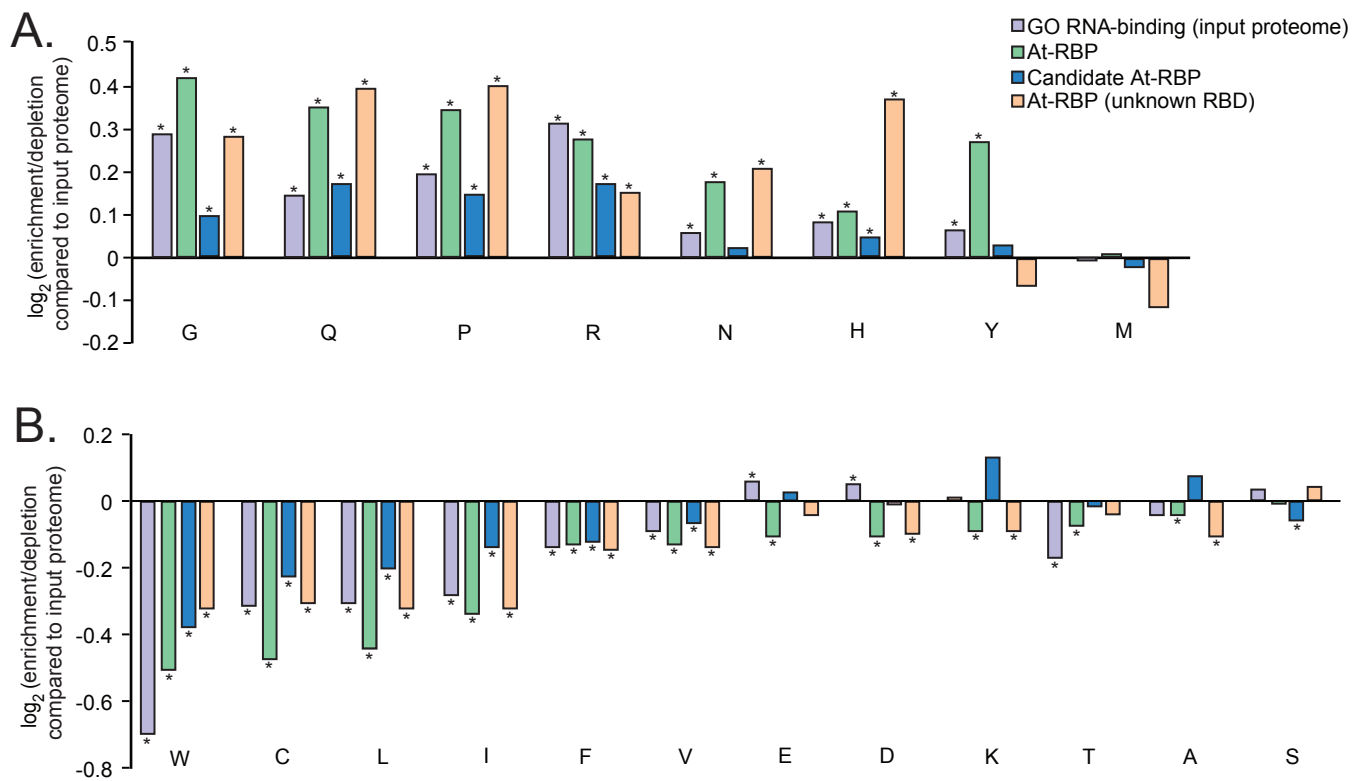

Supplemental Figure 4. Analysis of amino acid enrichment/depletion in the Arabidopsis mRNA interactome. Log<sub>2</sub> enrichment (A) and depletion (B) of amino acids of At-RBPs (green), proteins from the input proteome annotated as 'RNA-binding' (light purple), At-RBPs with unknown RBD (light orange) and candidate At-RBP (blue) compared to the input proteome. Amino acids that are significantly ( $p < 0.001$ ) enriched/ depleted compared to the input proteome are marked with asterisks. Number of proteins in each RBP set: input proteome N=8246, GO RNA-binding (input proteome) N= 339, At-RBPs N=300, candidate At-RBPs N= 437, At-RBPs (unknown RBD) N= 61.

**Supplemental Table 1: Zinc-finger proteins not associated with RNA-binding identified by mRNA interactome capture.**

| Gene ID   | Protein name                                     | Protein domain   | FDR      |
|-----------|--------------------------------------------------|------------------|----------|
| AT3G06410 | Zinc finger CCCH domain-containing protein 34    | zf-CCCH          | 4.36E-15 |
| AT5G18550 | Zinc finger CCCH domain-containing protein 58    | zf-CCCH          | 6.85E-15 |
| AT2G47850 | Zinc finger CCCH domain-containing protein 32    | zf-CCCH          | 7.18E-11 |
| AT3G15680 | Ran BP2/NZF zinc finger-like superfamily protein | zf-RanBP         | 2.53E-08 |
| AT1G67325 | RanBP2-type zinc finger protein                  | zf-RanBP         | 9.1E-08  |
| AT5G63260 | Zinc finger CCCH domain-containing protein 67    | zf-CCCH          | 9.84E-07 |
| AT3G62240 | RING/U-box superfamily protein                   | zf-C2H2, zf-RING | 2.98E-06 |
| AT1G10170 | NF-X1-type zinc finger protein NFXL1             | zf-NF-X1         | 1.81E-05 |
| AT2G02160 | Zinc finger CCCH domain-containing protein 17    | zf-CCCH          | 2.9E-05  |
| AT1G75560 | zinc knuckle (CCHC-type) family protein          | zf-CCHC          | 1.66E-03 |

**Supplemental Table 2: Examples of potential non-canonical RBPs identified by mRNA interactome capture.**

| Gene ID                            | Protein name                                                 | Protein domain               | Function                                                                                            | FDR                  |
|------------------------------------|--------------------------------------------------------------|------------------------------|-----------------------------------------------------------------------------------------------------|----------------------|
| <b>Cytoskeleton</b>                |                                                              |                              |                                                                                                     |                      |
| AT1G49240                          | ACTIN 8                                                      | Actin                        | structural constituent of cytoskeleton                                                              | 2.49E-04             |
| AT1G04820<br>AT4G20890             | Tubulin alpha-4 chain<br>Tubulin beta-3 chain                | Tubulin                      | structural constituent of cytoskeleton                                                              | 6.63E-06<br>9.47E-06 |
| <b>Enzymes/metabolism</b>          |                                                              |                              |                                                                                                     |                      |
| AT1G20620                          | Catalase-3 (CAT3)                                            | Catalase                     | catalyzes the breakdown of hydrogen peroxide (H <sub>2</sub> O <sub>2</sub> ) into water and oxygen | 1.17E-03             |
| AT5G64100                          | Peroxidase 69                                                | Peroxidase                   | uses H <sub>2</sub> O <sub>2</sub> to catalyse oxidative reactions                                  | 1.05E-04             |
| AT5G20250                          | RAFFINOSE SYNTHASE 6 (RS6)                                   | Raffinose_syn                | involved in carbohydrate metabolism                                                                 | 2.88E-04             |
| AT3G17390                          | S-adenosylmethionine synthase 4 (METK4)                      | S-adoMet_synt                | biosynthesis of S-adenosylmethionine                                                                | 1.97E-05             |
| AT5G63650                          | Serine/threonine-protein kinase (SRK2G)                      | Pkinase                      | SNF1-related protein kinase                                                                         | 3.96E-05             |
| AT2G32000                          | DNA topoisomerase type IA                                    | Toprim                       | DNA unwinding, involved in DNA replication                                                          | 4E-05                |
| AT4G14990                          | Topoisomerase II-associated protein (PAT1)                   | PAT1                         | isomerase activity                                                                                  | 3.32E-03             |
| <b>Membrane proteins/transport</b> |                                                              |                              |                                                                                                     |                      |
| AT5G03280                          | Ethylene-insensitive protein 2 (EIN2)                        | Nramp                        | Involved in ethylene signal transduction                                                            | 3.58E-09             |
| AT4G27500                          | Proton pump-interactor 1 (PPI1)                              | No annotated domains         | interacts with H <sup>+</sup> -ATPase and regulates its activity                                    | 6.85E-15             |
| AT1G20110                          | FYVE DOMAIN PROTEIN REQUIRED FOR ENDOSOMAL SORTING 1 (FREE1) | FYVE                         | regulates multivesicular/ prevacuolar compartment protein sorting                                   | 2.41E-04             |
| AT3G53420                          | Aquaporin PIP2-1                                             | MIP                          | Transport of water and small solutes                                                                | 2.09E-05             |
| AT2G37170                          | Aquaporin PIP2-2                                             | MIP                          | Transport of water and small solutes                                                                | 8.79E-03             |
| AT4G35100                          | Aquaporin PIP2-7                                             | MIP                          | Transport of water and small solutes                                                                | 5.44E-05             |
| AT2G38750                          | ANNEXIN 4 (ANN4)                                             | Annexin                      | Ca <sup>2+</sup> dependent membrane binding protein                                                 | 4.91E-07             |
| <b>Photoreceptors</b>              |                                                              |                              |                                                                                                     |                      |
| AT1G09570                          | Phytochrome A (PHYA)                                         | GAF;HATPase_C; HisKA;PAS;PHY | red/far-red light photoreceptor                                                                     | 1.49E-03             |
| AT3G45780                          | Phototropin-1 (PHOT1)                                        | Pkinase                      | Blue-light photoreceptor                                                                            | 3.48E-03             |
| <b>Miscellaneous</b>               |                                                              |                              |                                                                                                     |                      |
| AT5G56030                          | Heat shock protein 90.2 (HSP90.2)                            | HSP90                        | Molecular chaperone assisting in the synthesis and folding of proteins                              | 5.07E-03             |
| AT2G34040                          | Apoptosis inhibitory protein 5 (API5)                        | API5                         | unknown                                                                                             | 4.81E-13             |
| AT1G10170                          | NF-X1-type zinc finger protein (NFXL1)                       | Zf-NF-X1                     | negative regulator of the trichothecene phytotoxin-induced defense response                         | 1.81E-05             |
| AT2G42680                          | Multiprotein-bridging factor 1A (MBF1A)                      | HTH_3;MBF1                   | Transcriptional co-activator                                                                        | 2.7E-03              |
| AT2G32080                          | Purine-rich alpha 1 (PURA1)                                  | PurA                         | Transcription factor                                                                                | 2.52E-09             |
